# Supplementary material
Source: Royal Society of Chemistry journal article supplement (doi:10.1039/d5dd00422e)
Supplement: d5dd00422e4.pdf [file d5dd00422e4.pdf]

## Supplemental Material

# A Deep Learning Approach to Searching Property Spaces of Materials

Robert J. Appleton<sup>1</sup>, Brian C. Barnes<sup>2</sup>, Steven F. Son<sup>3</sup>, Alejandro Strachan<sup>1</sup>

<sup>1</sup> School of Materials Engineering and Birck Nanotechnology Center, Purdue University, West Lafayette, Indiana 47907, USA

<sup>2</sup> U.S. Army Combat Capabilities Development Command Army Research Laboratory, Aberdeen Proving Ground, Maryland 21005, USA

<sup>3</sup> School of Mechanical Engineering, Purdue University, West Lafayette, Indiana 47907, USA

## S1. Model Hyperparameters and Training Details

**Table S1.** Summary of hyperparameters to train D-MPNN. All unlisted hyperparameters are the defaults. Models were developed with chemprop 1.7.0.<sup>1,2</sup>

| Parameter                             | Value(s)                       |
|---------------------------------------|--------------------------------|
| Max epochs                            | 100                            |
| Batch size                            | 16                             |
| Train-validation splits               | 0.9, 0.1                       |
| Number of message-passing steps       | 5                              |
| Dimensionality of MPNN hidden layers  | 1200                           |
| Dropout probability                   | 0.25                           |
| Number of layers in FFN               | 2                              |
| Dimensionality of FFN hidden layers   | 1200                           |
| Targets (scaled with standard scalar) | $T_m, T_b, T_d, \log_{10} P_v$ |
| Target weights                        | 1, 5, 35, 10                   |

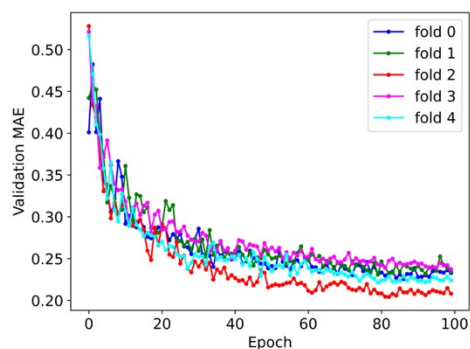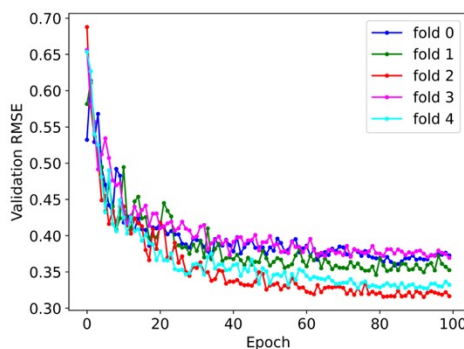

**Figure S1.** Learning curves for each model: validation mean absolute error (a) and validation root mean squared error (b).

## S2. Trivial Solutions in Optimization Problems

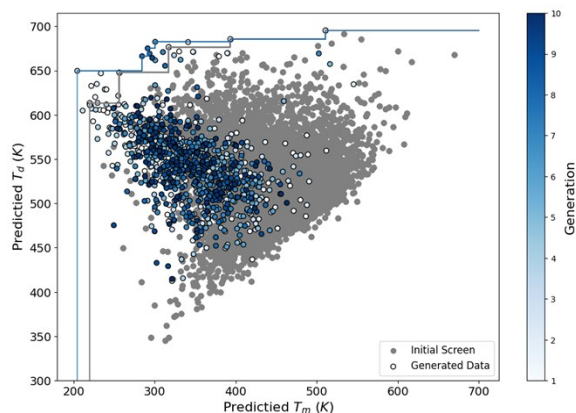

**Figure S2.** Distribution of predicted decomposition temperature and predicted melting temperature. This preliminary result highlights that Pareto optimization alone can lead to trivial solutions. In this example, we find that the GA finds it easier to generate thermally stable liquids and gases, as shown by the number of points with melting temperatures below room temperature.

## S3. Parameters for Genetic Algorithm

**Table S2.** Summary of parameters used in the JANUS genetic algorithm for all experiments. Full details of each parameter can be referenced here.<sup>3</sup> All unlisted parameters are the defaults.

| Parameter                          | Value(s)                                                                              |
|------------------------------------|---------------------------------------------------------------------------------------|
| Crossover number of random samples | 5 (sampling experiments)<br>1*, 5 (hyperparameter experiments)                        |
| Exploit number of mutations        | 5 (sampling experiments)<br>10% of generation size, 400* (hyperparameter experiments) |
| Exploit number of random samples   | 5 (sampling experiments)<br>10% of generation size, 400* (hyperparameter experiments) |
| Generation size                    | 50 (sampling experiments)<br>50, 100, 200 (hyperparameter experiments)                |
| Generations                        | 10 (sampling experiments)<br>25 (hyperparameter experiments)                          |
| Top molecules                      | 5                                                                                     |

\* Indicates a default parameter for JANUS.

## S4. Sampling Experiments

### S4.1. Liquid Stability Range and Distance from Ideal Melting Temperature

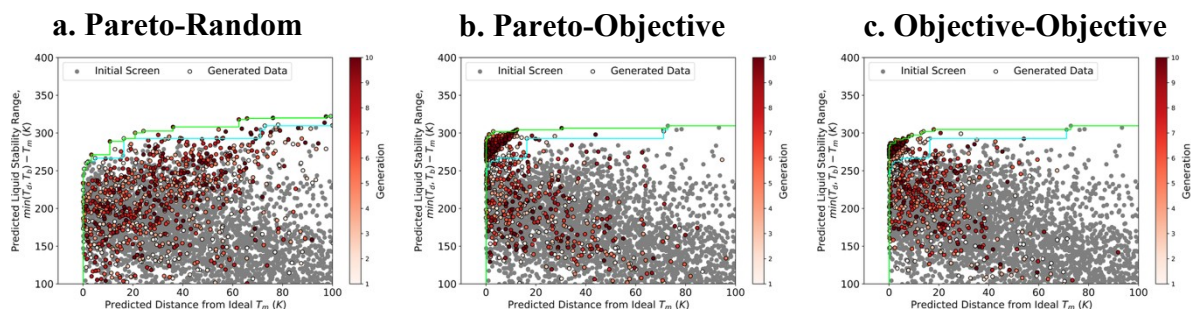

**Figure S3.** Distribution of predicted liquid stability ranges and distances from ideal melting temperature for CHNO molecules from literature (grey) and generated (red). The Pareto front for the initial population is represented by the cyan step function and the Pareto front for the final population is represented by the lime green step function. The results using random down-sampling in the explorative population and distance from the Pareto front as the fitness function are shown in (a). The results using the objective function for down-sampling in the explorative population and distance from the Pareto front as the fitness function are shown in (b). The results using the objective function for down-sampling and the fitness function are shown in (c). Only a single experiment is shown in each plot, however, each experiment was repeated 5 times for statistics.

### S4.2. Liquid Stability Range and Vapor Pressure

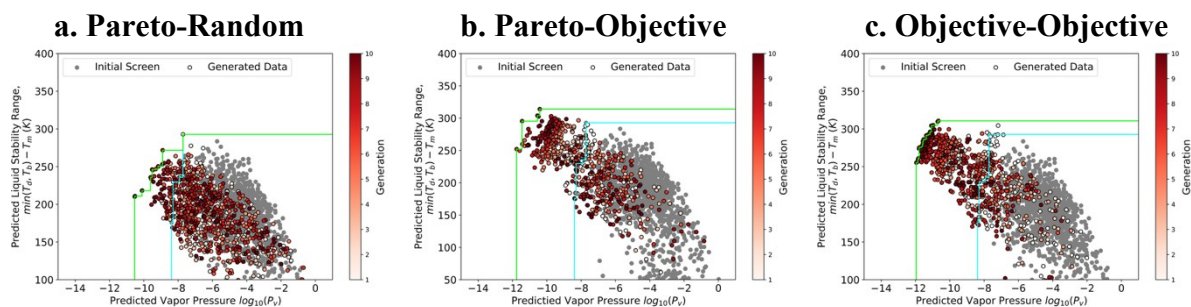

**Figure S4.** Distribution of predicted liquid stability ranges and vapor pressures for CHNO molecules from literature (grey) and generated (red). The Pareto front for the initial population is represented by the cyan step function and the Pareto front for the final population is represented by the lime green step function. The results using random down-sampling in the explorative population and distance from the Pareto front as the fitness function are shown in (a). The results using the objective function for down-sampling in the explorative population and distance from the Pareto front as the fitness function are shown in (b). The results using the objective function for down-sampling and the fitness function are shown in (c). Only a single experiment is shown in each plot, however, each experiment was repeated 5 times for statistics.

## S5. Hyperparameter Experiments

### S5.1. Liquid Stability Range and Distance from Ideal Melting Temperature

**Table S3.** Results of the hyperparameter experiments for optimizing  $\Delta T_{liq}$  and  $\Delta T_{im}$ . Each experiment was evolved for 25 generations. In the table below,  $N_{pop}$  is the generation size,  $N_{cross}$  is the number of crossovers in the exploration population,  $N_{mut}$  is the number of mutations and random samples for the exploitation population,  $N_{mols\ eval}$  is the number of unique molecules evaluated,  $N_{mols\ pop}$  is the number of unique molecules that were selected into the population, and  $N_{mols\ melt-cast}$  is the number of unique molecules from the population that met the criteria to be considered melt-castable.

| $N_{pop}$ | $N_{cross}$ | $N_{mut}$ | $N_{mols\ eval}$ | $N_{mols\ pop}$ | $N_{mols\ melt-cast}$ | Wall time |
|-----------|-------------|-----------|------------------|-----------------|-----------------------|-----------|
| 50        | 5           | 5         | 305944           | 2443            | 1810                  | 3D-19HR   |
| 50        | 1           | 400       | 618518           | 1475            | 1322                  | 7D-16HR   |
| 100       | 5           | 10        | 523796           | 4482            | 3460                  | 5D-16HR   |
| 100       | 1           | 400       | 718055           | 4244            | 3954                  | 9D-16HR   |
| 200       | 5           | 20        | 705991           | 8879            | 7356                  | 8D-07HR   |
| 200       | 1           | 400       | 842972           | 8263            | 6790                  | 9D-06HR   |

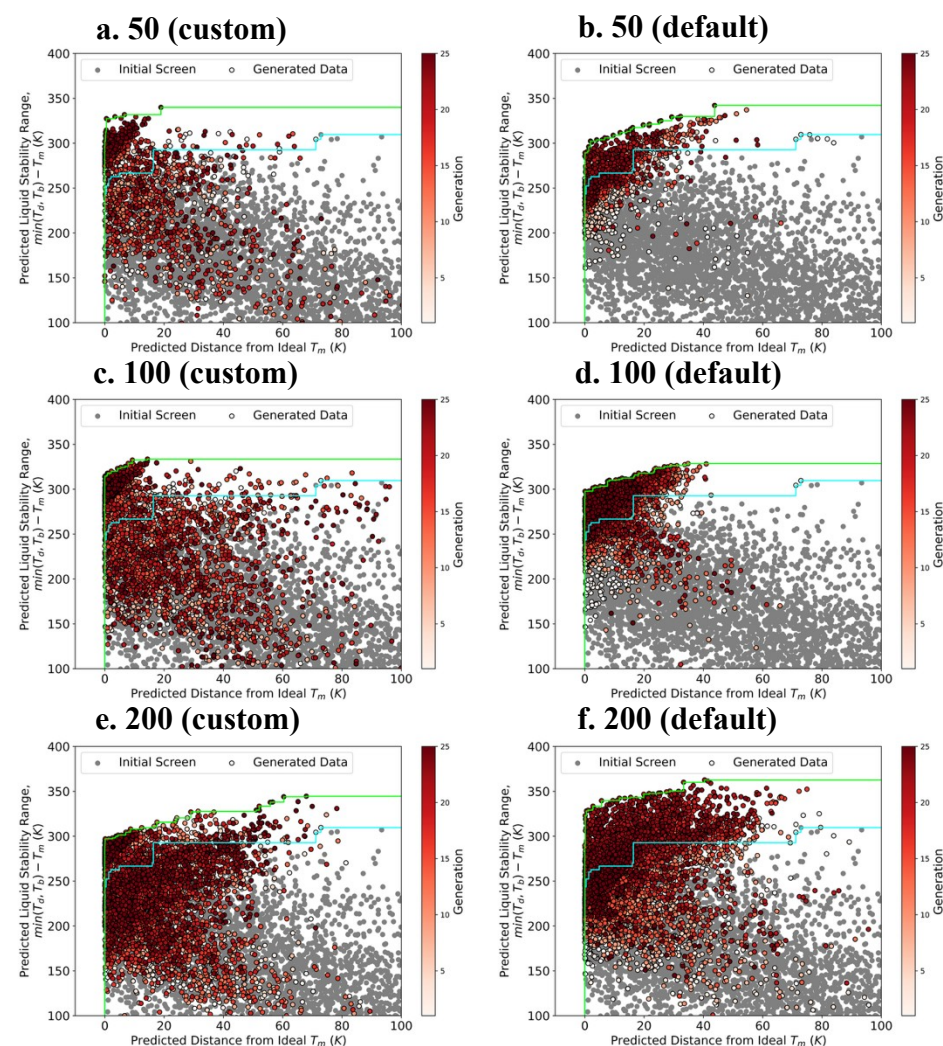

**Figure S5.** Distribution of predicted liquid stability ranges and distances from ideal melting temperature for CHNO molecules from literature (grey) and generated (red). The Pareto front for the initial population is represented by the cyan step function and the Pareto front for the final population is represented by the lime green step function. The results are shown for a population size of 50 (a,b), 100 (c,d), and 200 (e,f).

## S5.2. Liquid Stability Range and Vapor Pressure

**Table S4.** Same as Table S3, except these are the results of hyperparameter experiments for optimizing  $\Delta T_{liq}$  and  $\log_{10}(P_v)$ . Each experiment was evolved for 25 generations.

| N <sub>pop</sub> | N <sub>cross</sub> | N <sub>mut</sub> | N <sub>mols</sub> eval | N <sub>mols</sub> pop | N <sub>mols</sub> melt-cast | Wall time |
|------------------|--------------------|------------------|------------------------|-----------------------|-----------------------------|-----------|
| 50               | 5                  | 5                | 214015                 | 2205                  | 2179                        | 2D-02HR   |
| 50               | 1                  | 400              | 605562                 | 1770                  | 1770                        | 7D-14HR   |
| 100              | 5                  | 10               | 328037                 | 4435                  | 4323                        | 4D-10HR   |
| 100              | 1                  | 400              | 619238                 | 3862                  | 3862                        | 8D-10HR   |
| 200              | 5                  | 20               | 678909                 | 8980                  | 8748                        | 6D-02HR   |
| 200              | 1                  | 400              | 943894                 | 8308                  | 8305                        | 12D-12HR  |

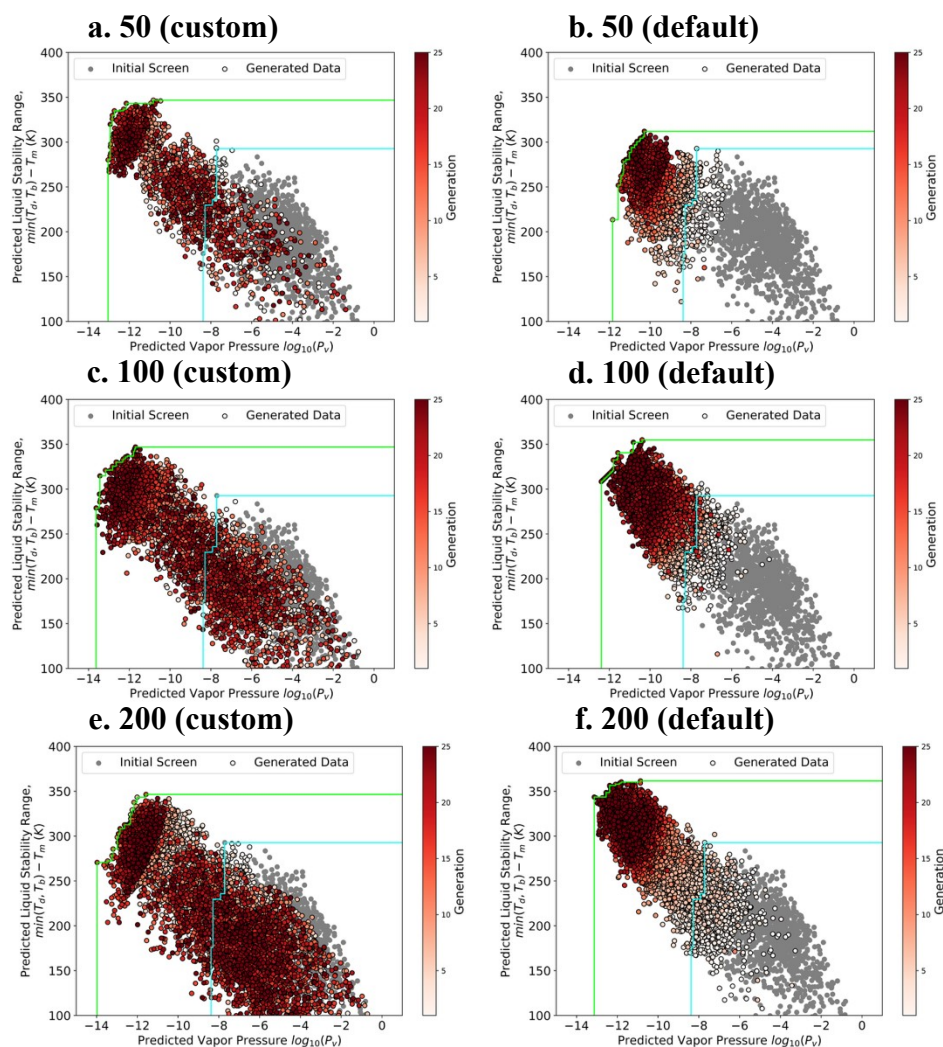

**Figure S6.** Distribution of predicted liquid stability ranges and vapor pressure for CHNO molecules from literature (grey) and generated (red). The Pareto front for the initial population is represented by the cyan step function and the Pareto front for the final population is represented by the lime green step function. The results are shown for a population size of 50 (a,b), 100 (c,d), and 200 (e,f).

## S6. Generated Molecules

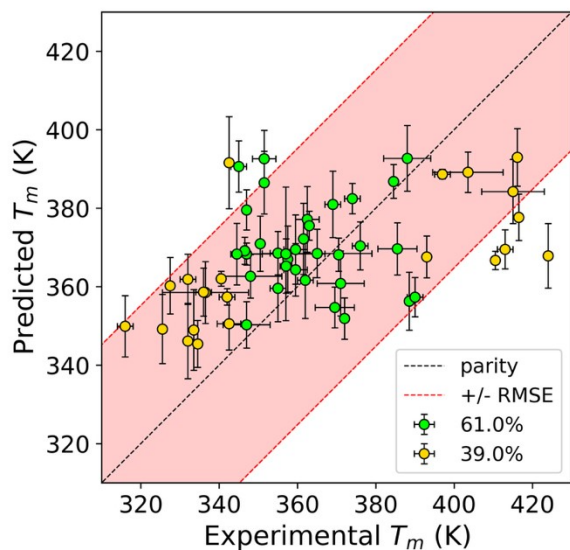

**Figure S7.** Available experimental melting temperatures for the rediscovered molecules compared to the ML predictions. The vertical error bars correspond to the standard deviation of the predictions across the 5 models. The horizontal error bars correspond to the standard deviation of the experimental measurements. The red region captures  $\pm 35.2K$  (the evaluated RMSE of the model). The green points have a melting temperature within the range to be melted via steam heating, and the yellow points are outside the range.

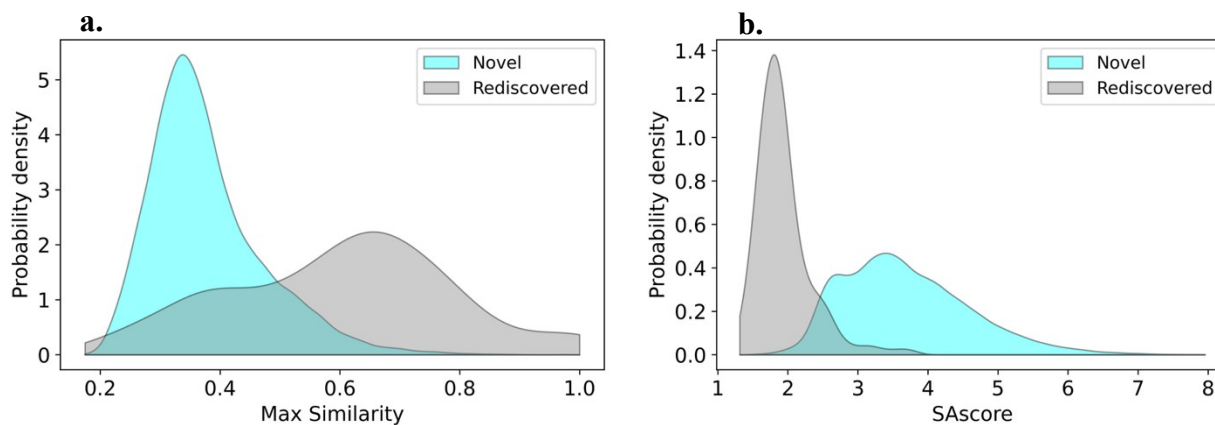

**Figure S8.** Distributions of maximum similarity (a) and SAScore (b) for the novel generated melt-cast candidates (cyan) and the rediscovered molecules (grey).

## Supplemental References

1. Yang, K., Swanson, K., Jin, W., Coley, C., Eiden, P., Gao, H., Guzman-Perez, A., Hopper, T., Kelley, B., Mathea, M., Palmer, A., Settels, V., Jaakkola, T., Jensen, K. & Barzilay, R. Analyzing Learned Molecular Representations for Property Prediction. *J Chem Inf Model* 59, 3370–3388 (2019).
2. Heid, E., Greenman, K. P., Chung, Y., Li, S. C., Graff, D. E., Vermeire, F. H., Wu, H., Green, W. H. & McGill, C. J. Chemprop: A Machine Learning Package for Chemical Property Prediction. *J Chem Inf Model* 64, 9–17 (2024).
3. Nigam, A. K., Pollice, R. & Aspuru-Guzik, A. Parallel tempered genetic algorithm guided by deep neural networks for inverse molecular design. *Digital Discovery* 1, 390–404 (2022).
